# Supplementary material
Source: ML conference proceedings conference paper supplement (https://openaccess.thecvf.com/content/CVPR2025/html/Xia_Rectified_Diffusion_Guidance_CVPR_2025_paper.html)
Supplement: Supplementary file 1 [file Xia_Rectified_Diffusion_Guidance_CVPR_2025_supplemental.pdf]

# Rectified Diffusion Guidance for Conditional Generation

## Supplementary Material

Mengfei Xia<sup>1,2\*</sup>   Nan Xue<sup>2</sup>   Yujun Shen<sup>2†</sup>   Ran Yi<sup>3</sup>   Tieliang Gong<sup>4</sup>   Yong-Jin Liu<sup>1†</sup>

<sup>1</sup>Tsinghua University   <sup>2</sup>Ant Group

<sup>3</sup>Shanghai Jiao Tong University   <sup>4</sup>Xi'an Jiao Tong University

## Appendix

### A. Proofs and derivations

In this section, we will prove the theorems stated in the main manuscript.

#### A.1. Proof of Theorem 1

We first claim two lemmas which are crucial for the proof.

**Lemma 1.** *Let  $g(\mathbf{x}_t)$  and  $h(\mathbf{x}_t, \epsilon)$  be integrable functions, then the following equality holds.*

$$\mathbb{E}_{q(\mathbf{x})}[\langle g(\mathbf{x}), \mathbb{E}_{q(\epsilon|\mathbf{x})}[h(\mathbf{x}, \epsilon)|\mathbf{x}] \rangle] = \mathbb{E}_{q(\mathbf{x}, \epsilon)}[\langle g(\mathbf{x}), h(\mathbf{x}, \epsilon) \rangle], \quad (\text{S1})$$

in which  $\langle \cdot, \cdot \rangle$  is inner product.

*Proof of Lemma 1.* Note that

$$\mathbb{E}_{q(\mathbf{x})}[\langle g(\mathbf{x}), \mathbb{E}_{q(\epsilon|\mathbf{x})}[h(\mathbf{x}, \epsilon)|\mathbf{x}] \rangle] = \int \langle g(\mathbf{x}), \mathbb{E}_{q(\epsilon|\mathbf{x})}[h(\mathbf{x}, \epsilon)|\mathbf{x}] \rangle q(\mathbf{x}) d\mathbf{x} \quad (\text{S2})$$

$$= \int \langle g(\mathbf{x}), \int h(\mathbf{x}, \epsilon) q(\epsilon|\mathbf{x}) d\epsilon \rangle q(\mathbf{x}) d\mathbf{x} \quad (\text{S3})$$

$$= \int \int \langle g(\mathbf{x}), h(\mathbf{x}, \epsilon) \rangle q(\mathbf{x}) q(\epsilon|\mathbf{x}) d\epsilon d\mathbf{x} \quad (\text{S4})$$

$$= \mathbb{E}_{q(\mathbf{x}, \epsilon)}[\langle g(\mathbf{x}), h(\mathbf{x}, \epsilon) \rangle], \quad (\text{S5})$$

in which Eq. (S4) is by linearity of integral. □

**Lemma 2.** *The following equality of expectation holds:*

$$\mathbb{E}_{\mathbf{x}}[\epsilon_{\theta}(\mathbf{x}, t)] = \frac{1}{\sigma_t} \mathbb{E}_{\mathbf{x}}[\mathbf{x}] - \frac{\alpha_t}{\sigma_t} \mathbb{E}_{c, \mathbf{x}_0, \mathbf{x}}[\mathbf{x}_0]. \quad (\text{S6})$$

---

\*Work finished during internship at Ant Group.

†Corresponding author.

*Proof of Lemma 2.* Note that

$$\nabla_{\mathbf{x}} \log q_t(\mathbf{x}) = \frac{\nabla_{\mathbf{x}} q_t(\mathbf{x})}{q_t(\mathbf{x})} \quad (\text{S7})$$

$$= \frac{\nabla_{\mathbf{x}} \int q_t(\mathbf{x}|c)q(c)dc}{q_t(\mathbf{x})} \quad (\text{S8})$$

$$= \frac{\int \nabla_{\mathbf{x}} q_t(\mathbf{x}|c)q(c)dc}{q_t(\mathbf{x})} \quad (\text{S9})$$

$$= \frac{\int q_t(\mathbf{x}|c)q(c)\nabla_{\mathbf{x}} \log q_t(\mathbf{x}|c)dc}{q_t(\mathbf{x})} \quad (\text{S10})$$

$$= \int \frac{q_t(\mathbf{x}|c)q(c)}{q_t(\mathbf{x})} \nabla_{\mathbf{x}} \log q_t(\mathbf{x}|c)dc \quad (\text{S11})$$

$$= \mathbb{E}_{q_t(c|\mathbf{x})} [\nabla_{\mathbf{x}} \log q_t(\mathbf{x}|c)|\mathbf{x}]. \quad (\text{S12})$$

Therefore, we have

$$\epsilon_{\theta}(\mathbf{x}, t) = \mathbb{E}_{q_t(c|\mathbf{x})} [\epsilon_{\theta}(\mathbf{x}, c, t)|\mathbf{x}] \quad (\text{S13})$$

$$= \mathbb{E}_{q_t(c|\mathbf{x})} \left[ \mathbb{E}_{q(\mathbf{x}_0|\mathbf{x}, c)} \left[ \frac{\mathbf{x} - \alpha_t \mathbf{x}_0}{\sigma_t} \right] | \mathbf{x} \right] \quad (\text{S14})$$

$$= \mathbb{E}_{q_t(c, \mathbf{x}_0|\mathbf{x})} \left[ \frac{\mathbf{x} - \alpha_t \mathbf{x}_0}{\sigma_t} | \mathbf{x} \right] \quad (\text{S15})$$

$$= \frac{1}{\sigma_t} \mathbf{x} - \frac{\alpha_t}{\sigma_t} \mathbb{E}_{q_t(c, \mathbf{x}_0|\mathbf{x})} [\mathbf{x}_0 | \mathbf{x}], \quad (\text{S16})$$

and

$$\mathbb{E}_{\mathbf{x}} [\epsilon_{\theta}(\mathbf{x}, t)] = \frac{1}{\sigma_t} \mathbb{E}_{\mathbf{x}} [\mathbf{x}] - \frac{\alpha_t}{\sigma_t} \mathbb{E}_{\mathbf{x}} [\mathbb{E}_{q_t(c, \mathbf{x}_0|\mathbf{x})} [\mathbf{x}_0 | \mathbf{x}]] \quad (\text{S17})$$

$$= \frac{1}{\sigma_t} \mathbb{E}_{\mathbf{x}} [\mathbf{x}] - \frac{\alpha_t}{\sigma_t} \mathbb{E}_{c, \mathbf{x}_0, \mathbf{x}} [\mathbf{x}_0]. \quad (\text{S18})$$

□

Then we start to prove Theorem 1.

*Proof of Theorem 1.* Similar to derivation in DDIM [28], first rewrite  $J_{\delta, \gamma}$  as below:

$$J_{\delta, \gamma} = \mathbb{E} \left[ -\log \hat{p}_{\theta}(\mathbf{x}_0 | \mathbf{x}_1, c) + \sum_{t=2}^T D_{KL}(q_{\delta}(\mathbf{x}_{t-1} | \mathbf{x}_t, \mathbf{x}_0, c) \| \hat{p}_{\theta}(\mathbf{x}_{t-1} | \mathbf{x}_t, c)) \right] + C_1, \quad (\text{S19})$$

in which  $C_1$  is a constant not involving  $\gamma$  and  $\theta$ .

Note that  $\epsilon_\theta(\mathbf{x}_t, c, t) = \mathbb{E}_{q(\epsilon|\mathbf{x}_t, c)}[\epsilon|\mathbf{x}_t]$ . Hence, for  $t > 1$ :

$$\mathbb{E}_{q(\mathbf{x}_t, \mathbf{x}_0|c)}[D_{KL}(q_\delta(\mathbf{x}_{t-1}|\mathbf{x}_t, \mathbf{x}_0, c) \|\hat{p}_\theta(\mathbf{x}_{t-1}|\mathbf{x}_t, c))] \quad (\text{S20})$$

$$= \mathbb{E}_{q(\mathbf{x}_t, \mathbf{x}_0|c)}[D_{KL}(q_\delta(\mathbf{x}_{t-1}|\mathbf{x}_t, \mathbf{x}_0, c) \| q_\delta(\mathbf{x}_{t-1}|\mathbf{x}_t, \hat{\mathbf{f}}_\theta^t(\mathbf{x}_t, c), c))] \quad (\text{S21})$$

$$\propto \mathbb{E}_{q(\mathbf{x}_t, \mathbf{x}_0|c)}[\|\mathbf{x}_0 - \hat{\mathbf{f}}_\theta^t(\mathbf{x}_t, c)\|_2^2] \quad (\text{S22})$$

$$\propto \mathbb{E}_{\substack{\mathbf{x}_0 \sim q(\mathbf{x}_0|c) \\ \epsilon \sim \mathcal{N}(\mathbf{0}, \mathbf{I}) \\ \mathbf{x}_t = \alpha_t \mathbf{x}_0 + \sigma_t \epsilon}}[\|\epsilon - (\gamma \epsilon_\theta(\mathbf{x}_t, c, t) + (1 - \gamma) \epsilon_\theta(\mathbf{x}_t, t))\|_2^2] \quad (\text{S23})$$

$$= \mathbb{E}_{\mathbf{x}_0, \epsilon}[\|\gamma(\epsilon - \epsilon_\theta(\mathbf{x}_t, c, t)) + (1 - \gamma)(\epsilon - \epsilon_\theta(\mathbf{x}_t, t))\|_2^2] \quad (\text{S24})$$

$$= \mathbb{E}_{\mathbf{x}_0, \epsilon}[\gamma^2 \|\epsilon - \epsilon_\theta(\mathbf{x}_t, c, t)\|_2^2 + (1 - \gamma)^2 \|\epsilon - \epsilon_\theta(\mathbf{x}_t, t)\|_2^2 \\ + 2\gamma(1 - \gamma) \mathbb{E}_{\mathbf{x}_0, \epsilon}[\langle \epsilon - \epsilon_\theta(\mathbf{x}_t, c, t), \epsilon - \epsilon_\theta(\mathbf{x}_t, t) \rangle]] \quad (\text{S25})$$

$$= \mathbb{E}_{\mathbf{x}_0, \epsilon}[\gamma^2 \|\epsilon - \epsilon_\theta(\mathbf{x}_t, c, t)\|_2^2 + (1 - \gamma)^2 \|\epsilon - \epsilon_\theta(\mathbf{x}_t, t)\|_2^2 \\ + 2\gamma(1 - \gamma) \mathbb{E}_{\mathbf{x}_0, \epsilon}[\langle \epsilon - \mathbb{E}_{q(\epsilon|\mathbf{x}_t, c)}[\epsilon|\mathbf{x}_t], \epsilon - \epsilon_\theta(\mathbf{x}_t, t) \rangle]] \quad (\text{S26})$$

$$= \mathbb{E}_{\mathbf{x}_0, \epsilon}[\gamma^2 \|\epsilon - \epsilon_\theta(\mathbf{x}_t, c, t)\|_2^2 + (1 - \gamma)^2 \|\epsilon - \epsilon_\theta(\mathbf{x}_t, t)\|_2^2 \\ + 2\gamma(1 - \gamma) \mathbb{E}_{\mathbf{x}_0, \epsilon}[\langle \epsilon - \epsilon, \epsilon - \epsilon_\theta(\mathbf{x}_t, t) \rangle]] \quad (\text{S27})$$

$$= \gamma^2 \mathbb{E}_{\mathbf{x}_0, \epsilon}[\|\epsilon - \epsilon_\theta(\mathbf{x}_t, c, t)\|_2^2] + (1 - \gamma)^2 \mathbb{E}_{\mathbf{x}_0, \epsilon}[\|\epsilon - \epsilon_\theta(\mathbf{x}_t, t)\|_2^2], \quad (\text{S28})$$

in which Eq. (S27) is from Lemma 1. As for  $t = 1$  we have similar derivation:

$$\mathbb{E}_{q(\mathbf{x}_1, \mathbf{x}_0|c)}[-\log \hat{p}_\theta(\mathbf{x}_0|\mathbf{x}_1, c)] \quad (\text{S29})$$

$$\propto \mathbb{E}_{q(\mathbf{x}_1, \mathbf{x}_0|c)}[\|\mathbf{x}_0 - \hat{\mathbf{f}}_\theta^1(\mathbf{x}_1, c)\|_2^2] + C_2 \quad (\text{S30})$$

$$\propto \mathbb{E}_{\substack{\mathbf{x}_0 \sim q(\mathbf{x}_0|c) \\ \epsilon \sim \mathcal{N}(\mathbf{0}, \mathbf{I}) \\ \mathbf{x}_1 = \alpha_1 \mathbf{x}_0 + \sigma_1 \epsilon}}[\|\epsilon - (\gamma \epsilon_\theta(\mathbf{x}_1, c, 1) + (1 - \gamma) \epsilon_\theta(\mathbf{x}_1, 1))\|_2^2] + C_3 \quad (\text{S31})$$

$$= \gamma^2 \mathbb{E}_{\mathbf{x}_0, \epsilon}[\|\epsilon - \epsilon_\theta(\mathbf{x}_1, c, 1)\|_2^2] + (1 - \gamma)^2 \mathbb{E}_{\mathbf{x}_0, \epsilon}[\|\epsilon - \epsilon_\theta(\mathbf{x}_1, 1)\|_2^2] + C_3, \quad (\text{S32})$$

in which  $C_2$  and  $C_3$  are constants not involving  $\gamma$  and  $\theta$ . Given that CFG involves score matching using both conditional and unconditional distributions, and that  $J_{\delta, \gamma}$  is proportional to the score matching objective up to a constant, we confirm the equivalence between  $J_{\delta, \gamma}$  and objective of native DPM under CFG.

Note that in native PF-ODE, we have

$$\frac{d\mathbf{x}_t}{dt} = f_t \mathbf{x}_t - \frac{1}{2} g_t^2 \nabla_{\mathbf{x}_t} \log q_t(\mathbf{x}_t|c), \quad (\text{S33})$$

$$\mathbb{E}_{q_t(\mathbf{x}_t|c)}[\nabla_{\mathbf{x}_t} \log q_t(\mathbf{x}_t|c)] = \mathbb{E}_{q_t(\mathbf{x}_t|c)}[\mathbb{E}_{q_t(\mathbf{x}_0|\mathbf{x}_t, c)}[\nabla_{\mathbf{x}_t} \log q_t(\mathbf{x}_t|\mathbf{x}_0, c)]] \quad (\text{S34})$$

$$= \mathbb{E}_{q_t(\mathbf{x}_0, \mathbf{x}_t|c)}[\nabla_{\mathbf{x}_t} \log q_t(\mathbf{x}_t|\mathbf{x}_0, c)] \quad (\text{S35})$$

$$= 0, \quad (\text{S36})$$

in which Eq. (S36) holds since forward diffusion process  $q_t(\mathbf{x}_t|\mathbf{x}_0, c)$  is implemented by adding Gaussian noise. However, according to Eq. (10) and Lemma 2, we have

$$\mathbb{E}_{\mathbf{x}_t}[s_{t, \gamma}(\mathbf{x}_t, c)] = \mathbb{E}_{\mathbf{x}_t}[\gamma \nabla_{\mathbf{x}_t} \log q_t(\mathbf{x}_t|c) + (1 - \gamma) \nabla_{\mathbf{x}_t} \log q_t(\mathbf{x}_t)] \quad (\text{S37})$$

$$= (1 - \gamma) \mathbb{E}_{\mathbf{x}_t}[\nabla_{\mathbf{x}_t} \log q_t(\mathbf{x}_t)] \quad (\text{S38})$$

$$= \frac{\gamma - 1}{\sigma_t^2} (\mathbb{E}_{\mathbf{x}_t}[\mathbf{x}_t] - \alpha_t \mathbb{E}_{c, \mathbf{x}_0, \mathbf{x}_t}[\mathbf{x}_0]) \quad (\text{S39})$$

$$= \frac{\gamma - 1}{\sigma_t^2} (\mathbb{E}_{q_t(\mathbf{x}_t|c)}[\mathbf{x}_t] - \alpha_t \mathbb{E}_{q_0(\mathbf{x}_0, c)}[\mathbf{x}_0]). \quad (\text{S40})$$

Note that  $\mathbb{E}_{q_t(\mathbf{x}_t|c)}[\mathbf{x}_t] = \alpha_t \mathbb{E}_{q_0(\mathbf{x}_0|c)}[\mathbf{x}_0]$ , and that  $\mathbb{E}_{\mathbf{x}_0, c}[\mathbf{x}_0] = \int \mathbb{E}_{q_0(\mathbf{x}_0|c)}[\mathbf{x}_0] dc$ . Therefore when  $\gamma \neq 1$ ,  $\mathbb{E}_{\mathbf{x}_t}[s_{t, \gamma}(\mathbf{x}_t, c)]$  is not guaranteed to be identical with 0. In other words, denoising with CFG cannot be expressed as a reciprocal of diffusion process with Gaussian noise.  $\square$

## A.2. Proof of Theorem 2

*Proof.* Given Eq. (9), for  $\gamma > 1$ , we have

$$s_{t,\gamma}(\mathbf{x}_t, c) = \gamma \nabla_{\mathbf{x}_t} \log q_t(\mathbf{x}_t|c) + (1 - \gamma) \nabla_{\mathbf{x}_t} \log q_t(\mathbf{x}_t) \quad (\text{S41})$$

$$= -\gamma \frac{\mathbf{x}_t - c}{t+1} - (1 - \gamma) \frac{\mathbf{x}_t}{t+2}, \quad (\text{S42})$$

$$\frac{d\mathbf{x}_t}{dt} = -\frac{1}{2} s_{t,\gamma}(\mathbf{x}_t, c) \quad (\text{S43})$$

$$= \mathbf{x}_t \left( \frac{\gamma}{2(t+1)} + \frac{1-\gamma}{2(t+2)} \right) - c \frac{\gamma}{2(t+1)}. \quad (\text{S44})$$

By variation of constants formula, we can analytically solve  $q_{0,\gamma}^{\text{deter}}(\mathbf{x}_0|c)$  in Eq. (S44).

$$\mathbf{x}_t = e^{\int_T^t \frac{\gamma}{2(s+1)} + \frac{1-\gamma}{2(s+2)} ds} \left( C - \int_T^t c \frac{\gamma}{2(s+1)} e^{-\int_s^t \frac{\gamma}{2(r+1)} + \frac{1-\gamma}{2(r+2)} dr} ds \right) \quad (\text{S45})$$

$$= (t+1)^{\frac{\gamma}{2}} (t+2)^{\frac{1-\gamma}{2}} \left( C - c \frac{\gamma}{2} \int_T^t (s+1)^{-\frac{\gamma+2}{2}} (s+2)^{-\frac{1-\gamma}{2}} ds \right), \quad (\text{S46})$$

in which  $C$  is a constant to determine. Let  $t = T$ , we can see that

$$C = \frac{\mathbf{x}_T}{(T+1)^{\frac{\gamma}{2}} (T+2)^{\frac{1-\gamma}{2}}}. \quad (\text{S47})$$

Therefore, we achieve the closed-form formula for  $q_{0,\gamma}^{\text{deter}}(\mathbf{x}_0|c)$  as below:

$$\mathbf{x}_0 = 2^{\frac{1-\gamma}{2}} \left( \frac{\mathbf{x}_T}{(T+1)^{\frac{\gamma}{2}} (T+2)^{\frac{1-\gamma}{2}}} + c \frac{\gamma}{2} \int_0^T (s+1)^{-\frac{\gamma+2}{2}} (s+2)^{-\frac{1-\gamma}{2}} ds \right). \quad (\text{S48})$$

Since  $q_T(\mathbf{x}_T|c) \sim \mathcal{N}(c, T+1)$ , we can deduce that

$$q_{0,\gamma}^{\text{deter}}(\mathbf{x}_0|c) \sim \mathcal{N} \left( c \phi(\gamma, T), 2^{1-\gamma} \frac{T+1}{(T+1)^\gamma (T+2)^{1-\gamma}} \right), \quad (\text{S49})$$

in which

$$\phi(\gamma, T) = 2^{\frac{1-\gamma}{2}} \left( \frac{1}{(T+1)^{\frac{\gamma}{2}} (T+2)^{\frac{1-\gamma}{2}}} + \frac{\gamma}{2} \int_0^T (s+1)^{-\frac{\gamma+2}{2}} (s+2)^{-\frac{1-\gamma}{2}} ds \right). \quad (\text{S50})$$

It is obvious that

$$\phi(\gamma) = 2^{\frac{1-\gamma}{2}} \frac{\gamma}{2} \int_0^{+\infty} (s+1)^{-\frac{\gamma+2}{2}} (s+2)^{-\frac{1-\gamma}{2}} ds, \quad (\text{S51})$$

$$\lim_{T \rightarrow +\infty} \frac{T+1}{(T+1)^\gamma (T+2)^{1-\gamma}} = 1. \quad (\text{S52})$$

Then it suffices to calculate  $\phi(\gamma)$  for all  $\gamma > 1$ . First note that

$$\phi(1) = \frac{1}{2} \int_0^{+\infty} (s+1)^{-\frac{3}{2}} ds = 1, \quad (\text{S53})$$

$$\phi(3) = 2^{-1} \frac{3}{2} \int_0^{+\infty} (s+1)^{-\frac{5}{2}} (s+2) ds = 2, \quad (\text{S54})$$

$$\phi(5) = 2^{-2} \frac{5}{2} \int_0^{+\infty} (s+1)^{-\frac{7}{2}} (s+2)^2 ds = \frac{7}{3}. \quad (\text{S55})$$

For  $\gamma > 1$ , denote by  $I(\gamma)$  with

$$I(\gamma) = \int_0^{+\infty} (s+1)^{-\frac{\gamma+2}{2}} (s+2)^{-\frac{1-\gamma}{2}} ds. \quad (\text{S56})$$

Note that for  $\gamma > 1$  we have

$$I(\gamma) = \int_0^{+\infty} (s+1)^{-\frac{\gamma+2}{2}} (s+2)^{-\frac{1-\gamma}{2}} ds \quad (\text{S57})$$

$$= \frac{2}{\gamma+1} \int_0^{+\infty} (s+1)^{-\frac{\gamma+2}{2}} d(s+2)^{\frac{\gamma+1}{2}} \quad (\text{S58})$$

$$= \frac{2}{\gamma+1} \left( (s+1)^{-\frac{\gamma+1}{2}} (s+2)^{\frac{\gamma+1}{2}} \Big|_0^{+\infty} + \frac{\gamma+2}{2} \int_0^{+\infty} (s+1)^{-\frac{\gamma+4}{2}} (s+2)^{\frac{\gamma+1}{2}} ds \right) \quad (\text{S59})$$

$$= \frac{2}{\gamma+1} \left( \frac{\gamma+2}{2} I(\gamma+2) - 2^{\frac{\gamma+1}{2}} \right). \quad (\text{S60})$$

Therefore, for  $\gamma > 1$  we have

$$\phi(\gamma) = \frac{2\gamma}{\gamma+1} (\phi(\gamma+2) - 1), \quad (\text{S61})$$

$$\phi(\gamma+2) = 1 + \frac{\gamma+1}{2\gamma} \phi(\gamma). \quad (\text{S62})$$

From Eqs. (S53) to (S55) we have

$$I(1) = 2, \quad I(3) = \frac{8}{3}, \quad I(5) = \frac{56}{15}. \quad (\text{S63})$$

For  $\gamma \in [1, 3]$ , by Cauchy-Schwarz inequality with  $p \in [0, 1]$ , we have

$$\left( I(\gamma) \right)^p \left( I(5) \right)^{1-p} \quad (\text{S64})$$

$$= \left( \int_0^{+\infty} (s+1)^{-\frac{\gamma+2}{2}} (s+2)^{-\frac{1-\gamma}{2}} ds \right)^p \left( \int_0^{+\infty} (s+1)^{-\frac{7}{2}} (s+2)^2 ds \right)^{1-p} \quad (\text{S65})$$

$$\geq \int_0^{+\infty} \left( (s+1)^{-\frac{\gamma+2}{2}} (s+2)^{-\frac{1-\gamma}{2}} \right)^p \left( (s+1)^{-\frac{7}{2}} (s+2)^2 \right)^{1-p} ds \quad (\text{S66})$$

$$= \int_0^{+\infty} (s+1)^{-\frac{\gamma p - 5p + 7}{2}} (s+2)^{-\frac{5p - \gamma p - 4}{2}} ds. \quad (\text{S67})$$

Let  $p = \frac{2}{5-\gamma} \in [0, 1]$  for  $\gamma \in [1, 3]$ , from Eq. (S67) we have

$$I(\gamma) \geq \left( I(3) \right)^{\frac{5-\gamma}{2}} \left( I(5) \right)^{\frac{\gamma-3}{2}} = \left( \frac{8}{3} \right)^{\frac{5-\gamma}{2}} \left( \frac{56}{15} \right)^{\frac{\gamma-3}{2}}. \quad (\text{S68})$$

Therefore for  $\gamma \in [1, 3]$ , we have

$$\phi(\gamma) \geq 2^{\frac{1-\gamma}{2}} \frac{\gamma}{2} \left( \frac{8}{3} \right)^{\frac{5-\gamma}{2}} \left( \frac{56}{15} \right)^{\frac{\gamma-3}{2}} = \gamma \frac{7}{15} \left( \frac{10}{7} \right)^{\frac{5-\gamma}{2}} =: h_1(\gamma) \quad (\text{S69})$$

Since  $\frac{1}{\gamma} - \frac{1}{2} \log \frac{10}{7} > 0$  for  $\gamma \in [1, 3]$ ,  $h_1(\gamma)$  increases monotonically on  $\in [1, 3]$  and  $h_1(1) = \frac{20}{21}$ ,  $h_1(3) = 2$ . Similarly, for

$\gamma \in [3, 5]$ , by Cauchy-Schwarz inequality with  $p \in [0, 1]$ , we have

$$\left(I(1)\right)^{1-p} \left(I(\gamma)\right)^p \quad (S70)$$

$$= \left(\int_0^{+\infty} (s+1)^{-\frac{3}{2}} ds\right)^{1-p} \left(\int_0^{+\infty} (s+1)^{-\frac{\gamma+2}{2}} (s+2)^{-\frac{1-\gamma}{2}} ds\right)^p \quad (S71)$$

$$\geq \int_0^{+\infty} \left((s+1)^{-\frac{3}{2}}\right)^{1-p} \left((s+1)^{-\frac{\gamma+2}{2}} (s+2)^{-\frac{1-\gamma}{2}}\right)^p ds \quad (S72)$$

$$= \int_0^{+\infty} (s+1)^{-\frac{3-p+\gamma p}{2}} (s+2)^{-\frac{p-\gamma p}{2}} ds. \quad (S73)$$

Let  $p = \frac{2}{\gamma-1} \in [0, 1]$  for  $\gamma \in [3, 5]$ , from Eq. (S73) we have

$$I(\gamma) \geq \left(I(1)\right)^{\frac{3-\gamma}{2}} \left(I(3)\right)^{\frac{\gamma-1}{2}} = 2^{\frac{3-\gamma}{2}} \left(\frac{8}{3}\right)^{\frac{\gamma-1}{2}}. \quad (S74)$$

Therefore for  $\gamma \in [3, 5]$

$$\phi(\gamma) \geq 2^{\frac{1-\gamma}{2}} \frac{\gamma}{2} 2^{\frac{3-\gamma}{2}} \left(\frac{8}{3}\right)^{\frac{\gamma-1}{2}} = \gamma \left(\frac{2}{3}\right)^{\frac{\gamma-1}{2}} =: h_2(\gamma) \quad (S75)$$

It is easy to see that  $h_2(\gamma) \geq 2$  for  $\gamma \in [3, 5]$ . Then by mathematical induction and Eq. (S62), we have  $\phi(\gamma) \geq 2$  for all  $\gamma \geq 3$ . Specially, we have

$$\lim_{\gamma \rightarrow +\infty} \phi(\gamma) = 2. \quad (S76)$$

And specifically, for  $\gamma \in \mathbb{N}$ ,  $\gamma > 1$ , we analytically calculate  $\phi(\gamma, T)$  for  $\gamma = 2n + 1$  and  $\gamma = 2n$ , respectively. First let  $\gamma = 2n + 1$ ,  $n \in \mathbb{N}$ . We can see that

$$(s+2)^{-\frac{1-\gamma}{2}} = (s+2)^n = \sum_{k=0}^n C_n^k (s+1)^k. \quad (S77)$$

$$\int_0^T (s+1)^{-\frac{\gamma+2}{2}} (s+2)^{-\frac{1-\gamma}{2}} ds = \int_0^T (s+1)^{-\frac{\gamma+2}{2}} \left(\sum_{k=0}^n C_n^k (s+1)^k\right) ds \quad (S78)$$

$$= \sum_{k=0}^n \left(C_n^k \int_0^T (s+1)^{\frac{2k-\gamma-2}{2}} ds\right) \quad (S79)$$

$$= \sum_{k=0}^n \left(C_n^k \frac{2}{2k-\gamma} \left((T+1)^{\frac{2k-\gamma}{2}} - 1\right)\right). \quad (S80)$$

Since  $2k - \gamma < 0$  for  $k = 0, 1, \dots, n$ , we have  $(T+1)^{\frac{2k-\gamma}{2}} \rightarrow 0$  as  $T$  goes to infinity and hence

$$\phi(\gamma, T) \quad (S81)$$

$$= 2^{\frac{1-\gamma}{2}} \left(\frac{1}{(T+1)^{\frac{\gamma}{2}} (T+2)^{\frac{1-\gamma}{2}}} + \frac{\gamma}{2} \int_0^T (s+1)^{-\frac{\gamma+2}{2}} (s+2)^{-\frac{1-\gamma}{2}} ds\right) \quad (S82)$$

$$= 2^{\frac{1-\gamma}{2}} \left(\frac{1}{(T+1)^{\frac{\gamma}{2}} (T+2)^{\frac{1-\gamma}{2}}} + \frac{\gamma}{2} \left(\sum_{k=0}^n C_n^k \frac{2}{2k-\gamma} \left((T+1)^{\frac{2k-\gamma}{2}} - 1\right)\right)\right) \quad (S83)$$

$$= 2^{\frac{1-\gamma}{2}} \left(\frac{1}{(T+1)^{\frac{\gamma}{2}} (T+2)^{\frac{1-\gamma}{2}}} + \left(\sum_{k=0}^n C_n^k \frac{2n+1}{2n-2k+1} \left(1 - (T+1)^{\frac{2k-\gamma}{2}}\right)\right)\right). \quad (S84)$$

When  $T \rightarrow +\infty$ , we have

$$\phi(2n+1) = 2^{-n} \left( \sum_{k=0}^n C_n^k \frac{2n+1}{2n-2k+1} \right). \quad (\text{S85})$$

Then let  $\gamma = 2n$ ,  $n \in \mathbb{N}$ , and  $n \geq 1$ . We have

$$\int (s+1)^{-\frac{\gamma+2}{2}} (s+2)^{-\frac{1-\gamma}{2}} ds \quad (\text{S86})$$

$$= \int 2(s+1)^{-n-1} (\sqrt{s+2})^{2n} d\sqrt{s+2} \quad (\text{S87})$$

$$= \int 2(u^2-1)^{-n-1} u^{2n} du \quad (\text{S88})$$

$$= -\frac{1}{n} u^{2n-1} (u^2-1)^{-n} + \frac{2n-1}{n} \int (u^2-1)^{-n} u^{2n-2} du, \quad (\text{S89})$$

in which Eq. (S88) is due to integration by substitution with  $u = \sqrt{s+2} > 1$ , and Eq. (S89) is due to integration by parts. Denote by  $I_n$  with

$$I_n = \int 2(u^2-1)^{-n-1} u^{2n} du, \quad n \geq 0, \quad (\text{S90})$$

then we have

$$I_n = -\frac{1}{n} u^{2n-1} (u^2-1)^{-n} + \frac{2n-1}{2n} I_{n-1}, \quad n \geq 1. \quad (\text{S91})$$

For  $n \geq 1$ , let  $I_n = \frac{(2n-1)!!}{(2n)!!} A_n$ , then we have

$$\frac{(2n-1)!!}{(2n)!!} A_n = -\frac{1}{n} u^{2n-1} (u^2-1)^{-n} + \frac{2n-1}{2n} \frac{(2n-3)!!}{(2n-2)!!} A_{n-1}, \quad n \geq 2, \quad (\text{S92})$$

$$A_n = A_{n-1} - \frac{1}{n} \frac{(2n)!!}{(2n-1)!!} u^{2n-1} (u^2-1)^{-n}, \quad n \geq 2. \quad (\text{S93})$$

Therefore for  $n \geq 2$ , we have

$$A_n = A_1 - \sum_{k=2}^n \frac{1}{k} \frac{(2k)!!}{(2k-1)!!} u^{2k-1} (u^2-1)^{-k}, \quad (\text{S94})$$

and

$$I_n = \begin{cases} -\frac{u}{u^2-1} + \frac{1}{2} \log \frac{u-1}{u+1}, & n=1, \\ \frac{(2n-1)!!}{(2n)!!} \left( -\frac{2u}{u^2-1} + \log \frac{u-1}{u+1} - \sum_{k=2}^n \frac{1}{k} \frac{(2k)!!}{(2k-1)!!} \frac{u^{2k-1}}{(u^2-1)^k} \right), & n \geq 2. \end{cases} \quad (\text{S95})$$

Therefore, for  $\gamma = 2$  we have

$$\phi(\gamma, T) = 2^{\frac{1-\gamma}{2}} \left( \frac{1}{(T+1)^{\frac{\gamma}{2}} (T+2)^{\frac{1-\gamma}{2}}} + \frac{\gamma}{2} \int_0^T (s+1)^{-\frac{\gamma+2}{2}} (s+2)^{-\frac{1-\gamma}{2}} ds \right) \quad (\text{S96})$$

$$\begin{aligned} &= 2^{\frac{1-\gamma}{2}} \frac{1}{(T+1)^{\frac{\gamma}{2}} (T+2)^{\frac{1-\gamma}{2}}} \\ &\quad - 2^{\frac{1-\gamma}{2}} \frac{\gamma}{2} \left( \frac{\sqrt{T+2}}{T+1} - \sqrt{2} \right) \\ &\quad + 2^{\frac{1-\gamma}{2}} \frac{\gamma}{2} \frac{1}{2} \left( \log \frac{\sqrt{T+2}-1}{\sqrt{T+2}+1} - \log \frac{\sqrt{2}-1}{\sqrt{2}+1} \right), \end{aligned} \quad (\text{S97})$$

and for  $\gamma \geq 4$  we have

$$\phi(\gamma, T) \tag{S98}$$

$$= 2^{\frac{1-\gamma}{2}} \left( \frac{1}{(T+1)^{\frac{\gamma}{2}} (T+2)^{\frac{1-\gamma}{2}}} + \frac{\gamma}{2} \int_0^T (s+1)^{-\frac{\gamma+2}{2}} (s+2)^{-\frac{1-\gamma}{2}} ds \right) \tag{S99}$$

$$\begin{aligned} &= 2^{\frac{1-\gamma}{2}} \frac{1}{(T+1)^{\frac{\gamma}{2}} (T+2)^{\frac{1-\gamma}{2}}} \\ &\quad - 2^{\frac{1-\gamma}{2}} \frac{\gamma}{2} \frac{(2n-1)!!}{(2n)!!} \left( \frac{2\sqrt{T+2}}{T+1} - 2\sqrt{2} \right) \\ &\quad + 2^{\frac{1-\gamma}{2}} \frac{\gamma}{2} \frac{(2n-1)!!}{(2n)!!} \left( \log \frac{\sqrt{T+2}-1}{\sqrt{T+2}+1} - \log \frac{\sqrt{2}-1}{\sqrt{2}+1} \right) \\ &\quad - 2^{\frac{1-\gamma}{2}} \frac{\gamma}{2} \frac{(2n-1)!!}{(2n)!!} \left( \sum_{k=2}^n \frac{1}{k} \frac{(2k)!!}{(2k-1)!!} \left( \frac{(T+2)^{\frac{2k-1}{2}}}{(T+1)^k} - 2^{\frac{2k-1}{2}} \right) \right). \end{aligned} \tag{S100}$$

When  $T \rightarrow +\infty$ , we have

$$\phi(2n) = \begin{cases} 2^{\frac{1}{2}-n} n \left( \sqrt{2} - \frac{1}{2} \log \frac{\sqrt{2}-1}{\sqrt{2}+1} \right), & n = 1, \\ \frac{(2n-1)!! \sqrt{2} n}{(2n)!! 2^n} \left( \left( \sum_{k=2}^n \frac{1}{k} \frac{(2k)!!}{(2k-1)!!} 2^{k-\frac{1}{2}} \right) + 2\sqrt{2} - \log \frac{\sqrt{2}-1}{\sqrt{2}+1} \right), & n \geq 2. \end{cases} \tag{S101}$$

□

### A.3. Proof of Theorem 3

*Proof.* We first write the closed-form expressions of DDIM sampler as below:

$$\mathbf{x}_{t-1} = \frac{\alpha_{t-1}}{\alpha_t} \mathbf{x}_t + \left( \sigma_{t-1} - \frac{\alpha_{t-1}}{\alpha_t} \sigma_t \right) \epsilon_{\theta}(\mathbf{x}_t, c, t), \tag{S102}$$

$$\tilde{\mathbf{x}}_{t-1} = \frac{\alpha_{t-1}}{\alpha_t} \tilde{\mathbf{x}}_t + \left( \sigma_{t-1} - \frac{\alpha_{t-1}}{\alpha_t} \sigma_t \right) (\gamma_1 \epsilon_{\theta}(\tilde{\mathbf{x}}_t, c, t) + \gamma_0 \epsilon_{\theta}(\tilde{\mathbf{x}}_t, t)). \tag{S103}$$

Then we have

$$\Delta_{t-1} = \mathbb{E}_{\mathbf{x}_t}[\mathbf{x}_{t-1}] - \mathbb{E}_{\tilde{\mathbf{x}}_t}[\tilde{\mathbf{x}}_{t-1}] \tag{S104}$$

$$\begin{aligned} &= \frac{\alpha_{t-1}}{\alpha_t} (\mathbb{E}_{\mathbf{x}_t}[\mathbf{x}_t] - \mathbb{E}_{\tilde{\mathbf{x}}_t}[\tilde{\mathbf{x}}_t]) \\ &\quad + \left( \sigma_{t-1} - \frac{\alpha_{t-1}}{\alpha_t} \sigma_t \right) (\mathbb{E}_{\mathbf{x}_t}[\epsilon_{\theta}(\mathbf{x}_t, c)] - \mathbb{E}_{\tilde{\mathbf{x}}_t}[\gamma_1 \epsilon_{\theta}(\tilde{\mathbf{x}}_t, c, t) + \gamma_0 \epsilon_{\theta}(\tilde{\mathbf{x}}_t, t)]). \end{aligned} \tag{S105}$$

Note that

$$\epsilon_{\theta}(\mathbf{x}_t, c, t) = \mathbb{E}_{q(\mathbf{x}_0|\mathbf{x}_t, c)} \left[ \frac{\mathbf{x}_t - \alpha_t \mathbf{x}_0}{\sigma_t} | \mathbf{x}_t \right], \quad \epsilon_{\theta}(\tilde{\mathbf{x}}_t, c, t) = \mathbb{E}_{q(\mathbf{x}_0|\tilde{\mathbf{x}}_t, c)} \left[ \frac{\tilde{\mathbf{x}}_t - \alpha_t \mathbf{x}_0}{\sigma_t} | \tilde{\mathbf{x}}_t \right]. \tag{S106}$$

Therefore, by  $q_t(\mathbf{x}_t|c) = \int q_0(\mathbf{x}_0|c) q_{0t}(\mathbf{x}_t|\mathbf{x}_0, c) d\mathbf{x}_0$  and Lemma 1 we have

$$\mathbb{E}_{\mathbf{x}_t}[\epsilon_{\theta}(\mathbf{x}_t, c, t)] = \mathbb{E}_{\mathbf{x}_0, \mathbf{x}_t} \left[ \frac{\mathbf{x}_t - \alpha_t \mathbf{x}_0}{\sigma_t} \right] = \frac{1}{\sigma_t} \mathbb{E}_{\mathbf{x}_t}[\mathbf{x}_t] - \frac{\alpha_t}{\sigma_t} \mathbb{E}_{\mathbf{x}_0}[\mathbf{x}_0]. \tag{S107}$$

Similarly, by  $\hat{p}_{\theta}(\tilde{\mathbf{x}}_t|c) = \int q_0(\mathbf{x}_0|c) q_{0T}(\mathbf{x}_T|\mathbf{x}_0, c) \hat{p}_{\theta}(\tilde{\mathbf{x}}_t|\mathbf{x}_T, c) d\mathbf{x}_0 d\mathbf{x}_T$  we have

$$\mathbb{E}_{\tilde{\mathbf{x}}_t}[\epsilon_{\theta}(\tilde{\mathbf{x}}_t, c, t)] = \mathbb{E}_{\mathbf{x}_0, \tilde{\mathbf{x}}_t} \left[ \frac{\tilde{\mathbf{x}}_t - \alpha_t \mathbf{x}_0}{\sigma_t} \right] = \frac{1}{\sigma_t} \mathbb{E}_{\tilde{\mathbf{x}}_t}[\tilde{\mathbf{x}}_t] - \frac{\alpha_t}{\sigma_t} \mathbb{E}_{\mathbf{x}_0}[\mathbf{x}_0]. \tag{S108}$$



Then we can simplify  $\Delta_t$  as below:

$$\Delta_{t-1} = \frac{\alpha_{t-1}}{\alpha_t} \Delta_t + (\sigma_{t-1} - \frac{\alpha_{t-1}}{\alpha_t} \sigma_t) \left( \frac{1}{\sigma_t} \Delta_t - \mathbb{E}_{\tilde{\mathbf{x}}_t} [(\gamma_1 - 1) \epsilon_\theta(\tilde{\mathbf{x}}_t, c, t) + \gamma_0 \epsilon_\theta(\tilde{\mathbf{x}}_t, t)] \right) \quad (\text{S109})$$

$$= \frac{\sigma_{t-1}}{\sigma_t} \Delta_t - (\sigma_{t-1} - \frac{\alpha_{t-1}}{\alpha_t} \sigma_t) \mathbb{E}_{\tilde{\mathbf{x}}_t} [(\gamma_1 - 1) \epsilon_\theta(\tilde{\mathbf{x}}_t, c, t) + \gamma_0 \epsilon_\theta(\tilde{\mathbf{x}}_t, t)] \quad (\text{S110})$$

$$= \frac{\sigma_{t-1}}{\sigma_t} \Delta_t - (\sigma_{t-1} - \frac{\alpha_{t-1}}{\alpha_t} \sigma_t) \mathbb{E}_{\tilde{\mathbf{x}}_t} [\epsilon_{\gamma_1, \gamma_0}(\tilde{\mathbf{x}}_t)]. \quad (\text{S111})$$

$\Delta_t = 0$  implies that  $\mathbb{E}_{q_t(\mathbf{x}_t|c)}[\mathbf{x}_t] = \mathbb{E}_{\tilde{p}_\theta(\tilde{\mathbf{x}}_t|c)}[\tilde{\mathbf{x}}_t]$ . Therefore, by Eqs. (S107) and (S108) we have  $\mathbb{E}_{\mathbf{x}_t}[\epsilon_\theta(\mathbf{x}_t, c, t)] = \mathbb{E}_{\tilde{\mathbf{x}}_t}[\epsilon_\theta(\tilde{\mathbf{x}}_t, c, t)]$ . According to Lemma 2 and by calculating the expectation over  $\mathbf{x}_t$  and  $\tilde{\mathbf{x}}_t$  respectively, we have

$$\mathbb{E}_{\tilde{\mathbf{x}}_t}[\epsilon_\theta(\tilde{\mathbf{x}}_t, t)] = \frac{1}{\sigma_t} \mathbb{E}_{\tilde{\mathbf{x}}_t}[\tilde{\mathbf{x}}_t] - \frac{\alpha_t}{\sigma_t} \mathbb{E}_{c, \mathbf{x}_0, \tilde{\mathbf{x}}_t}[\mathbf{x}_0] = \frac{1}{\sigma_t} \mathbb{E}_{\tilde{\mathbf{x}}_t}[\tilde{\mathbf{x}}_t] - \frac{\alpha_t}{\sigma_t} \mathbb{E}_{c, \mathbf{x}_0}[\mathbf{x}_0], \quad (\text{S112})$$

$$\mathbb{E}_{\mathbf{x}_t}[\epsilon_\theta(\mathbf{x}_t, t)] = \frac{1}{\sigma_t} \mathbb{E}_{\mathbf{x}_t}[\mathbf{x}_t] - \frac{\alpha_t}{\sigma_t} \mathbb{E}_{c, \mathbf{x}_0, \mathbf{x}_t}[\mathbf{x}_0] = \frac{1}{\sigma_t} \mathbb{E}_{\mathbf{x}_t}[\mathbf{x}_t] - \frac{\alpha_t}{\sigma_t} \mathbb{E}_{c, \mathbf{x}_0}[\mathbf{x}_0]. \quad (\text{S113})$$

Since  $\Delta_t = 0$ , we have  $\mathbb{E}_{\mathbf{x}_t}[\epsilon_\theta(\mathbf{x}_t, t)] = \mathbb{E}_{\tilde{\mathbf{x}}_t}[\epsilon_\theta(\tilde{\mathbf{x}}_t, t)]$ , and thus

$$\Delta_{t-1} = -(\sigma_{t-1} - \frac{\alpha_{t-1}}{\alpha_t} \sigma_t) \mathbb{E}_{\mathbf{x}_t} [(\gamma_1 - 1) \epsilon_\theta(\mathbf{x}_t, c, t) + \gamma_0 \epsilon_\theta(\mathbf{x}_t, t)] \quad (\text{S114})$$

$$= -(\sigma_{t-1} - \frac{\alpha_{t-1}}{\alpha_t} \sigma_t) \mathbb{E}_{\mathbf{x}_t} [\epsilon_{\gamma_1, \gamma_0}(\mathbf{x}_t)]. \quad (\text{S115})$$

□

#### A.4. Proof of Theorem 4

*Proof.* Given Eq. (28), for any  $\gamma_1$  and  $\gamma_0$ , we have

$$s_{t, \gamma_1, \gamma_0}(\mathbf{x}_t, c) = \gamma_1 \nabla_{\mathbf{x}_t} \log q_t(\mathbf{x}_t|c) + \gamma_0 \nabla_{\mathbf{x}_t} \log q_t(\mathbf{x}_t) \quad (\text{S116})$$

$$= -\gamma_1 \frac{\mathbf{x}_t - c}{t+1} - \gamma_0 \frac{\mathbf{x}_t}{t+2}, \quad (\text{S117})$$

$$\frac{d\mathbf{x}_t}{dt} = -\frac{1}{2} s_{t, \gamma_1, \gamma_0}(\mathbf{x}_t, c) \quad (\text{S118})$$

$$= \mathbf{x}_t \left( \frac{\gamma_1}{2(t+1)} + \frac{\gamma_0}{2(t+2)} \right) - c \frac{\gamma_1}{2(t+1)}. \quad (\text{S119})$$

By variation of constants formula, we can analytically solve  $q_{0, \gamma_1, \gamma_0}^{\text{deter}}(\mathbf{x}_0|c)$  in Eq. (S119).

$$\mathbf{x}_t = e^{\int_T^t \frac{\gamma_1}{2(s+1)} + \frac{\gamma_0}{2(s+2)} ds} \left( C - \int_T^t c \frac{\gamma_1}{2(s+1)} e^{-\int_s^t \frac{\gamma_1}{2(r+1)} + \frac{\gamma_0}{2(r+2)} dr} ds \right) \quad (\text{S120})$$

$$= (t+1)^{\frac{\gamma_1}{2}} (t+2)^{\frac{\gamma_0}{2}} \left( C - c \frac{\gamma_1}{2} \int_T^t (s+1)^{-\frac{\gamma_1+2}{2}} (s+2)^{-\frac{\gamma_0}{2}} ds \right), \quad (\text{S121})$$

in which  $C$  is a constant to determine. Let  $t = T$ , we can see that

$$C = \frac{\mathbf{x}_T}{(T+1)^{\frac{\gamma_1}{2}} (T+2)^{\frac{\gamma_0}{2}}}. \quad (\text{S122})$$

Therefore, we achieve the closed-form formula for  $q_{0, \gamma}^{\text{deter}}(\mathbf{x}_0|c)$  as below:

$$\mathbf{x}_0 = 2^{\frac{\gamma_0}{2}} \left( \frac{\mathbf{x}_T}{(T+1)^{\frac{\gamma_1}{2}} (T+2)^{\frac{\gamma_0}{2}}} + c \frac{\gamma_1}{2} \int_0^T (s+1)^{-\frac{\gamma_1+2}{2}} (s+2)^{-\frac{\gamma_0}{2}} ds \right). \quad (\text{S123})$$

Since  $q_T(\mathbf{x}_T|c) \sim \mathcal{N}(c, T+1)$ , we can deduce that

$$\text{var}_{q_{0, \gamma_1, \gamma_0}^{\text{deter}}(\mathbf{x}_0|c)}[\mathbf{x}_0] = 2^{\gamma_0} (T+1)^{1-\gamma_1} (T+2)^{-\gamma_0}. \quad (\text{S124})$$

□

### A.5. Proof of Theorem 5

*Proof.* According to Eqs. (32) and (33), we can write the variational lower bound of  $\hat{p}_\theta(\mathbf{x}_{0:T}|c)$  as below:

$$\begin{aligned} J_{\delta, \gamma_1, \gamma_0} &= \mathbb{E}_{q_\delta(\mathbf{x}_{0:T}|c)} [\log q_\delta(\mathbf{x}_{1:T}|\mathbf{x}_0, c) - \log \hat{p}_\theta(\mathbf{x}_{0:T}|c)] \\ &= \mathbb{E} [-\log \hat{p}_\theta(\mathbf{x}_0|\mathbf{x}_1, c)] \end{aligned} \quad (\text{S125})$$

$$\begin{aligned} &+ \mathbb{E} \left[ \sum_{t=2}^T D_{KL}(q_\delta(\mathbf{x}_{t-1}|\mathbf{x}_t, \mathbf{x}_0, c) \parallel \hat{p}_\theta(\mathbf{x}_{t-1}|\mathbf{x}_t, c)) \right] \\ &+ C_1, \end{aligned} \quad (\text{S126})$$

in which  $C_1$  is a constant not involving  $\gamma_1$ ,  $\gamma_0$ , and  $\theta$ .

Note that  $\epsilon_\theta(\mathbf{x}_t, c, t) = \mathbb{E}_{q(\epsilon|\mathbf{x}_t, c)} [\epsilon|\mathbf{x}_t]$ . Hence, for  $t > 1$ :

$$\mathbb{E}_{q(\mathbf{x}_t, \mathbf{x}_0|c)} [D_{KL}(q_\delta(\mathbf{x}_{t-1}|\mathbf{x}_t, \mathbf{x}_0, c) \parallel \hat{p}_\theta(\mathbf{x}_{t-1}|\mathbf{x}_t, c))] \quad (\text{S127})$$

$$= \mathbb{E}_{q(\mathbf{x}_t, \mathbf{x}_0|c)} [D_{KL}(q_\delta(\mathbf{x}_{t-1}|\mathbf{x}_t, \mathbf{x}_0, c) \parallel q_\delta(\mathbf{x}_{t-1}|\mathbf{x}_t, \hat{\mathbf{f}}_\theta^t(\mathbf{x}_t, c), c))] \quad (\text{S128})$$

$$\propto \mathbb{E}_{q(\mathbf{x}_t, \mathbf{x}_0|c)} [\|\mathbf{x}_0 - \hat{\mathbf{f}}_\theta^t(\mathbf{x}_t, c)\|_2^2] \quad (\text{S129})$$

$$\propto \mathbb{E}_{\substack{\mathbf{x}_0 \sim q(\mathbf{x}_0|c) \\ \epsilon \sim \mathcal{N}(\mathbf{0}, \mathbf{I}) \\ \mathbf{x}_t = \alpha_t \mathbf{x}_0 + \sigma_t \epsilon}} [\|\epsilon - (\gamma_1 \epsilon_\theta(\mathbf{x}_t, c, t) + \gamma_0 \epsilon_\theta(\mathbf{x}_t, t))\|_2^2] \quad (\text{S130})$$

$$\begin{aligned} &= \mathbb{E}_{\mathbf{x}_0, \epsilon} [\|\epsilon\|_2^2 + \|\gamma_1 \epsilon_\theta(\mathbf{x}_t, c, t) + \gamma_0 \epsilon_\theta(\mathbf{x}_t, t)\|_2^2 \\ &\quad - 2\mathbb{E}_{\mathbf{x}_0, \epsilon} [\langle \epsilon, \gamma_1 \epsilon_\theta(\mathbf{x}_t, c, t) + \gamma_0 \epsilon_\theta(\mathbf{x}_t, t) \rangle]] \end{aligned} \quad (\text{S131})$$

$$\begin{aligned} &= \mathbb{E}_{\mathbf{x}_0, \epsilon} [\|\epsilon\|_2^2 + \|\gamma_1 \epsilon_\theta(\mathbf{x}_t, c, t) + \gamma_0 \epsilon_\theta(\mathbf{x}_t, t)\|_2^2 \\ &\quad - 2\mathbb{E}_{\mathbf{x}_0, \epsilon} [\langle \mathbb{E}_{q(\epsilon|\mathbf{x}_t, c)} [\epsilon|\mathbf{x}_t], \gamma_1 \epsilon_\theta(\mathbf{x}_t, c, t) + \gamma_0 \epsilon_\theta(\mathbf{x}_t, t) \rangle]] \end{aligned} \quad (\text{S132})$$

$$\begin{aligned} &= \mathbb{E}_{\mathbf{x}_0, \epsilon} [\|\epsilon\|_2^2 + \|\gamma_1 \epsilon_\theta(\mathbf{x}_t, c, t) + \gamma_0 \epsilon_\theta(\mathbf{x}_t, t)\|_2^2 \\ &\quad - 2\mathbb{E}_{\mathbf{x}_0, \epsilon} [\langle \epsilon_\theta(\mathbf{x}_t, c, t), \gamma_1 \epsilon_\theta(\mathbf{x}_t, c, t) + \gamma_0 \epsilon_\theta(\mathbf{x}_t, t) \rangle]] \end{aligned} \quad (\text{S133})$$

$$\begin{aligned} &= \mathbb{E}_{\mathbf{x}_0, \epsilon} [\|\epsilon_\theta(\mathbf{x}_t, c, t)\|_2^2 + \|\gamma_1 \epsilon_\theta(\mathbf{x}_t, c, t) + \gamma_0 \epsilon_\theta(\mathbf{x}_t, t)\|_2^2 \\ &\quad - 2\mathbb{E}_{\mathbf{x}_0, \epsilon} [\langle \epsilon_\theta(\mathbf{x}_t, c, t), \gamma_1 \epsilon_\theta(\mathbf{x}_t, c, t) + \gamma_0 \epsilon_\theta(\mathbf{x}_t, t) \rangle]] \\ &\quad + \mathbb{E}_{\mathbf{x}_0, \epsilon} [\|\epsilon\|_2^2 - \|\epsilon_\theta(\mathbf{x}_t, c, t)\|_2^2] \end{aligned} \quad (\text{S134})$$

$$= \mathbb{E}_{\mathbf{x}_0, \epsilon} [\|\epsilon_\theta(\mathbf{x}_t, c, t) - (\gamma_1 \epsilon_\theta(\mathbf{x}_t, c, t) + \gamma_0 \epsilon_\theta(\mathbf{x}_t, t))\|_2^2] + C_2 \quad (\text{S135})$$

$$= \mathbb{E}_{\mathbf{x}_0, \epsilon} [\|(\gamma_1 - 1) \epsilon_\theta(\mathbf{x}_t, c, t) + \gamma_0 \epsilon_\theta(\mathbf{x}_t, t)\|_2^2] + C_2, \quad (\text{S136})$$

in which Eq. (S132) is from Lemma 1, and  $C_2 = \mathbb{E}_{\mathbf{x}_0, \epsilon} [\|\epsilon\|_2^2 - \|\epsilon_\theta(\mathbf{x}_t, c, t)\|_2^2]$  is constant not involving  $\gamma_1$  and  $\gamma_0$ . As for  $t = 1$  we have similar derivation:

$$\mathbb{E}_{q(\mathbf{x}_1, \mathbf{x}_0|c)} [-\log \hat{p}_\theta(\mathbf{x}_0|\mathbf{x}_1, c)] \quad (\text{S137})$$

$$\propto \mathbb{E}_{q(\mathbf{x}_1, \mathbf{x}_0|c)} [\|\mathbf{x}_0 - \hat{\mathbf{f}}_\theta^1(\mathbf{x}_1, c)\|_2^2] + C_3 \quad (\text{S138})$$

$$\propto \mathbb{E}_{\substack{\mathbf{x}_0 \sim q(\mathbf{x}_0|c) \\ \epsilon \sim \mathcal{N}(\mathbf{0}, \mathbf{I}) \\ \mathbf{x}_1 = \alpha_1 \mathbf{x}_0 + \sigma_1 \epsilon}} [\|\epsilon - (\gamma_1 \epsilon_\theta(\mathbf{x}_1, c, 1) + \gamma_0 \epsilon_\theta(\mathbf{x}_1, 1))\|_2^2] + C_4 \quad (\text{S139})$$

$$= \mathbb{E}_{\mathbf{x}_0, \epsilon} [\|(\gamma_1 - 1) \epsilon_\theta(\mathbf{x}_1, c, 1) + \gamma_0 \epsilon_\theta(\mathbf{x}_1, 1)\|_2^2] + C_5, \quad (\text{S140})$$

in which  $C_3$ ,  $C_4$ , and  $C_5$  are constants not involving  $\gamma_1$  and  $\gamma_0$ .  $\square$

### B. Pseudo-codes of Lookup Table

We below propose the pseudo-codes to achieve the lookup table and corresponding guided sampling in Algorithms 1 and 2.

---

**Algorithm 1** Pseudo-code to achieve lookup table of ReCFG in a PyTorch-like style.

---

```
1 def calculate_lookup_table(net, gnet, data_loader, timesteps):
2     """Defines the function to maintain the lookup table.
3
4     Args:
5         net: Noise prediction model for conditional score function.
6         gnet: Noise prediction model for unconditional score function.
7         data_loader: Dataloader to calculate score functions.
8         timesteps: All timesteps under the given sampling trajectory.
9
10    Returns:
11        coeffs: Lookup list under all timesteps and conditions.
12    """
13    sum1_dict, sum2_dict = dict(), dict()
14    # Iterate the dataloader.
15    for x, c in data_loader:
16        # Iterate for all timesteps.
17        sum1s, sum2s = list(), list()
18        for nfe_idx, t in enumerate(timesteps):
19            # Forward process.
20            noise = torch.randn_like(x)
21            x_t = alpha_t * x + sigma_t * noise
22
23            # Calculate score functions first.
24            eps_cond, eps_uncond = net(x_t, c, t), gnet(x_t, t)
25
26            # Calculate the expectation.
27            sum1s.append(eps_cond.mean(dim=0, keepdim=True))
28            sum2s.append(eps_uncond.mean(dim=0, keepdim=True))
29
30        # Save the results.
31        update_dict(sum1_dict, sum2_dict, c, sum1s, sum2s)
32
33    # Calculate coefficients according to Eq. (34) for all timesteps.
34    coeffs = {c: sum1_dict[c] / sum2_dict[c] for c in sum1_dict}
35
36    # Record the mean coefficient for other conditions.
37    coeffs.update(avg=sum(coeffs.values()) / len(coeffs))
38
39    return coeffs
```

---

---

**Algorithm 2** Pseudo-code for guided sampling by lookup table of ReCFG in a PyTorch-like style.

---

```
1 def guided_sampler(sampler, net, gnet, gamma_1, noise, c, timesteps, coeffs):
2     """Defines the guided sampling with lookup table.
3
4     Args:
5         sampler: Native sampler without guidance, e.g., DDIM sampler.
6         net: Noise prediction model for conditional score function.
7         gnet: Noise prediction model for unconditional score function.
8         gamma_1: Guidance strength similar to CFG of type 'float'.
9         noise: Initial random noise to denoise.
10        c: Input label.
11        timesteps: All timesteps under the given sampling trajectory.
12        coeffs: Pre-calculated lookup table.
13
14    Returns:
15        x: A batch of samples by guided sampling.
16    """
17    # Calculate gamma_0.
18    if c in coeffs:
19        gamma_0s = (1. - gamma_1) * coeffs[c]
20    else:
21        gamma_0s = (1. - gamma_1) * coeffs['avg']
22    # Ensure gamma_0 <= 0 and gamma_1 + gamma_0 >= 1.
23    gamma_0s = clamp(gamma_0s, gamma_1)
24
25    # Guided sampling using gamma_1 and gamma_0.
26    x = noise
27    for t, gamma_0 in zip(timesteps, gamma_0s):
28        # Calculate score functions and apply guided sampling.
29        eps_cond, eps_uncond = net(x, c, t), gnet(x, t)
30        eps = eps_cond * gamma_1 + eps_uncond * gamma_0
31        x = sampler(x, eps, t)
32
33    return x
```

---
